# Supplementary material for: Meat Quality, Amino Acid, and Fatty Acid Composition of Liangshan Pigs at Different Weights
Source: PubMed Central journal article supplement (PMC7278381; doi:10.3390/ani10050822), 2020-05-09
Supplement: animals-10-00822-s001.pdf [file animals-10-00822-s001.pdf]

**Table S1.** Ingredients of the basal experiment diets.

| <b>Item</b>        | <b>g/kg</b> |
|--------------------|-------------|
| Corn               | 772         |
| Soybean            | 200         |
| CaHPO <sub>4</sub> | 8           |
| CaCO <sub>3</sub>  | 7           |
| NaCl               | 3           |
| Lysine             | --          |
| Premix             | 10          |
